# Supplementary material for: A flexible piezoresistive pressure sensor comprising a microstructure printed with poly(3,4-ethylenedioxythiophene):poly(styrenesulfonate) copolymers@graphene hybrid ink
Source: Royal Society of Chemistry journal article supplement (doi:10.1039/d3tc01851b), 2023-01-01
Supplement: d3tc01851b1.pdf [file d3tc01851b1.pdf]

## Supporting Information

### **Flexible Piezoresistive Pressure Sensor Comprising Microstructure Printed with Poly (3,4-Ethylenedioxythiophene): Poly (Styrenesulfonate) Copolymers@ Graphene Hybrid Ink**

Haoyang Yao,<sup>a</sup> Zhiheng Yu,<sup>b,c</sup> Fengli Huang,<sup>\*b</sup> Taiyao Pan,<sup>b</sup> Chengli Tang<sup>b</sup>, and Hui Zhang<sup>b</sup>

a. College of Mechanical Engineering, Zhejiang University of Technology, Hangzhou Zhejiang, 310014, P. R. China

b. Key Laboratory of Medical Electronics and Digital Health of Zhejiang Province, Engineering Research Center of Intelligent Human Health Situation Awareness of Zhejiang Province, Jiaying University, Jiaying Zhejiang, 341000, P. R. China. E-mail: hfl@mail.zjxu.edu.cn

c. College of Mechanical and Electrical Engineering, Jiaying Nanhu University, Jiaying Zhejiang, 314000, P. R. China

## 1. Figures and Table

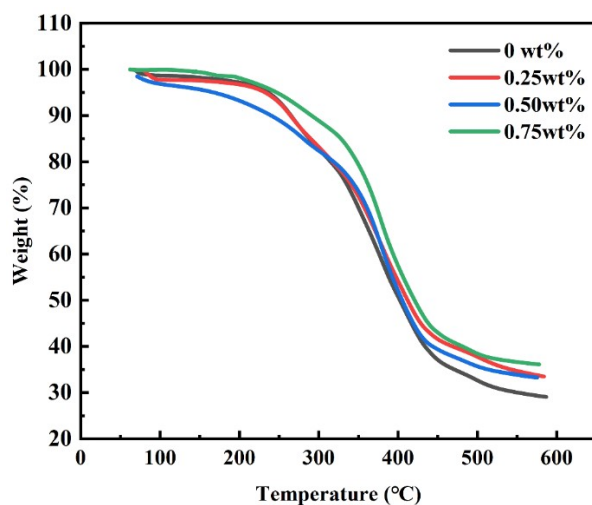

**Fig. S1** The TGA of PEDOT: PSS/Gr inks with different concentration

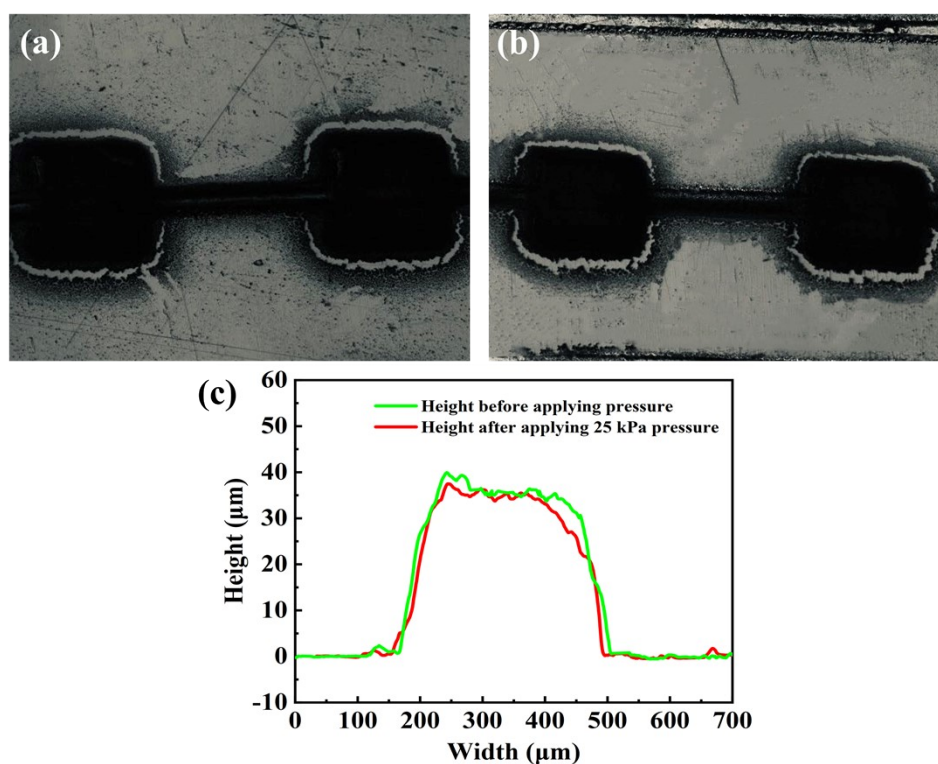

**Fig. S2** Structure stability of the printed PEDOT: PSS/Gr composite microstructure.

- a) Optical images of microstructures printed by PEDOT: PSS/Gr before applying pressure; b) Optical images of microstructures printed by PEDOT: PSS/Gr after applying 25 kPa pressure; c) Heights of microstructures printed by PEDOT: PSS/Gr before applying pressure and after applying 25 kPa pressure.

**Table S1** The overall performance of the pressure sensors based on different materials

| No. | Materials        | Sensitivity<br>/kPa <sup>-1</sup>                              | Detection<br>range /kPa | Response<br>time /ms | Relaxation<br>time /ms | Ref.      |
|-----|------------------|----------------------------------------------------------------|-------------------------|----------------------|------------------------|-----------|
| 1   | PC/PDMS          | 15.63                                                          | 0-20                    | 65                   | 75                     | Ref.#1    |
| 2   | PEDOT: PSS/PI    | 0.021 (0-1 kPa)<br>0.054 (1-7 kPa)<br>0.019 (7-17 kPa)         | 0-17                    | N/A                  | N/A                    | Ref.#2    |
| 3   | rGO              | 0.82 (0-0.6 kPa)                                               | 0.007-0.8               | 25                   | N/A                    | Ref.#3    |
| 4   | PEDOT:PSS/ITO    | 0.70                                                           | 0-20                    | N/A                  | N/A                    | Ref.#4    |
| 5   | PEDOT:PSS/EG     | 21 (0-100 Pa)<br>0.016 (0.1-1 kPa)                             | 0-1                     | 90                   | N/A                    | Ref.#5    |
| 6   | PEDOT:PSS        | 0.59                                                           | 0-20                    | /                    | 3200                   | Ref.#6    |
| 7   | PEDOT:PSS/PDMS   | 2.44                                                           | 0-6                     | 179                  | 120                    | Ref.#7    |
| 8   | PEDOT:PSS/CNT    | 0.0004-0.0197                                                  | 0-100                   | 170                  | 80                     | Ref.#8    |
| 9   | PEDOT: PSS/CNT   | 0.0335 (0-20 kPa)<br>0.0083 (20-40 kPa)<br>0.0018 (40-100 kPa) | 0-100                   | 134                  | 97                     | Ref.#9    |
| 10  | PEDOT: PSS/MXene | 0.27 (0-2 kPa)<br>0.031 (2-11 kPa)                             | 0-11                    | 106                  | 95                     | Ref.#10   |
| 11  | PEDOT: PSS/Gr    | 0.49                                                           | 0-25                    | 51                   | 42                     | This work |

## 2. References

- #1 X.-H. Zhao, S.-N. Ma, H. Long, H. Yuan, C. Y. Tang, P. K. Cheng and Y. H. Tsang, *ACS Appl. Mater. Interfaces*, 2018, **10**, 3986–3993.
- #2 X. Zhao, W. Wang, Z. Wang, J. Wang, T. Huang, J. Dong and Q. Zhang, *Chem. Eng. J.*, 2020, **395**, 125115.
- #3 C.-B. Huang, S. Witomska, A. Aliprandi, M.-A. Stoeckel, M. Bonini, A. Ciesielski and P. Samorì, *Adv. Mater.*, 2019, **31**, 1804600.
- #4 J.-C. Wang, R. S. Karmakar, T.-H. Lin, M.-C. Wu and K.-H. Chang, *J. Taiwan Inst. Chem. Eng.*, 2021, **126**, 297–306.
- #5 J. J. Lee, S. Gandla, B. Lim, S. Kang, S. Kim, S. Lee and S. Kim, *NPG Asia Mater.*,

2020, **12**, 65.

#6 R. S. Karmakar, Y.-J. Lu, Y. Fu, K.-C. Wei, S.-H. Chan, M.-C. Wu, J.-W. Lee, T.-K. Lin and J.-C. Wang, *Sci. Rep.*, 2017, **7**, 12252.

#7 H.-H. Jang, J.-S. Park and B. Choi, *Sens. Actuator A Phys.*, 2019, **286**, 107–114.

#8 F.-L. Gao, P. Min, X.-Z. Gao, C. Li, T. Zhang, Z.-Z. Yu and X. Li, *J. Mater. Chem. A*, 2022, **10**, 18256–18266.

#9 X.-Z. Gao, F.-L. Gao, J. Liu, Y. Li, P. Wan, Z.-Z. Yu and X. Li, *ACS Appl. Mater. Interfaces*, 2022, **14**, 43783–43791.

#10 S. Zhang, T. Tu, T. Li, Y. Cai, Z. Wang, Y. Zhou, D. Wang, L. Fang, X. Ye and B. Liang, *ACS Appl. Mater. Interfaces*, 2022, **14**, 23877–23887.
